# Supplementary material
Source: PubMed Central journal article supplement (PMC4758460)

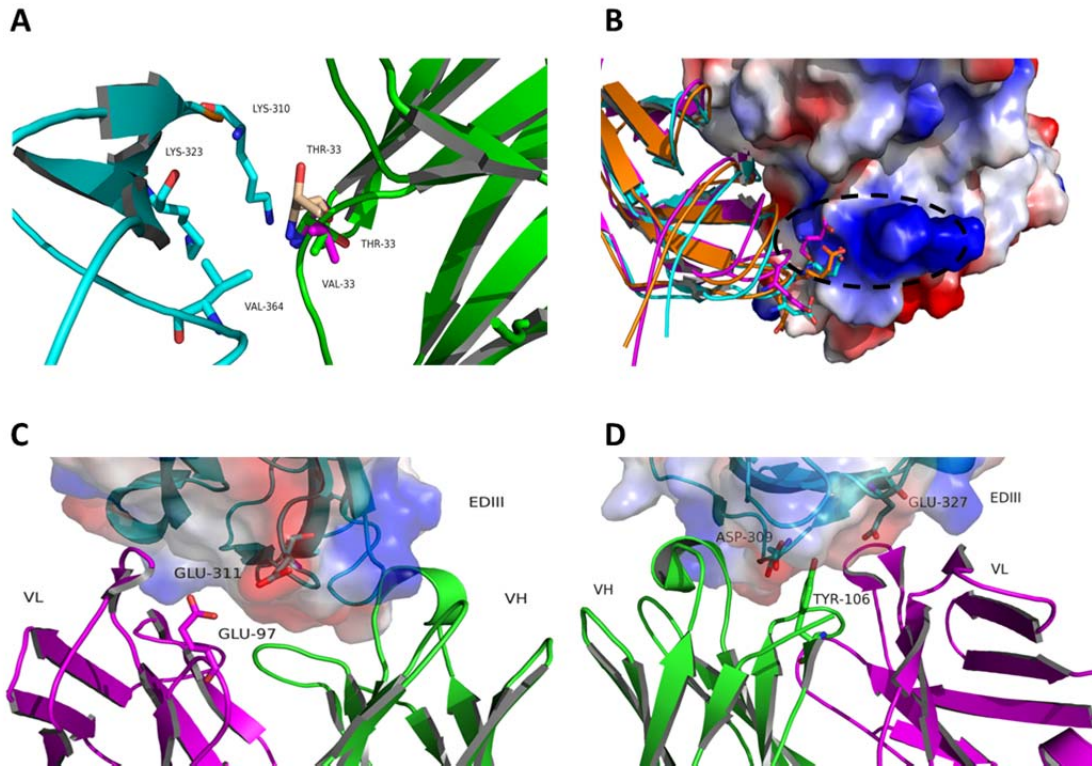

Supplement: NIHMS706754-supplement-1.pdf [file NIHMS706754-supplement-1.pdf]

A

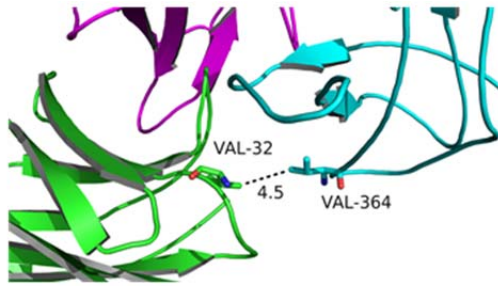

B

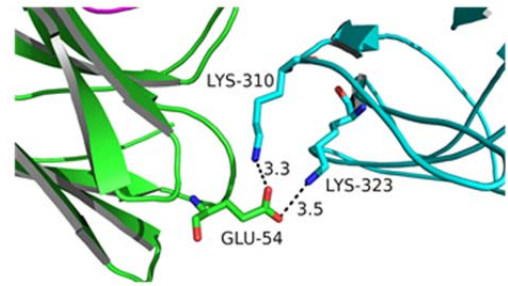

C

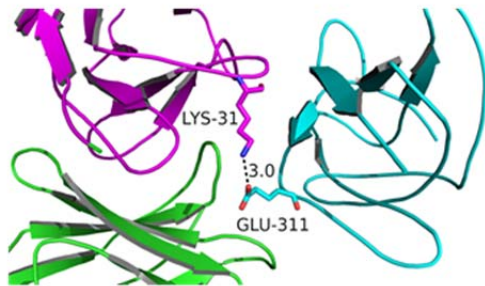

D

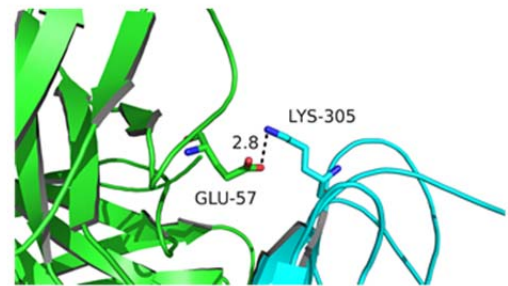

E

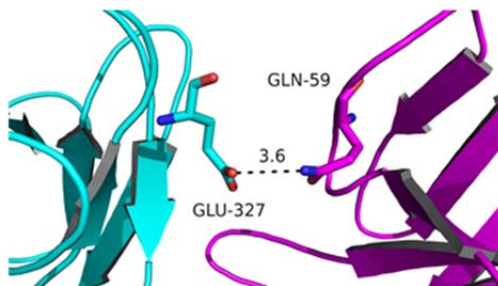

F

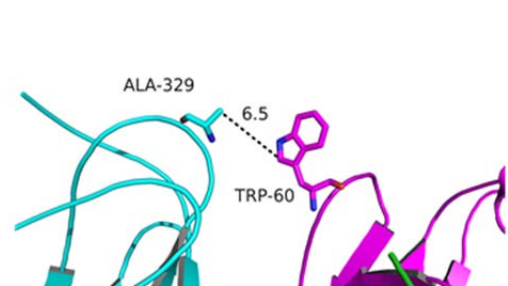

Supplement: NIHMS706754-supplement-2.pdf [file NIHMS706754-supplement-2.pdf]

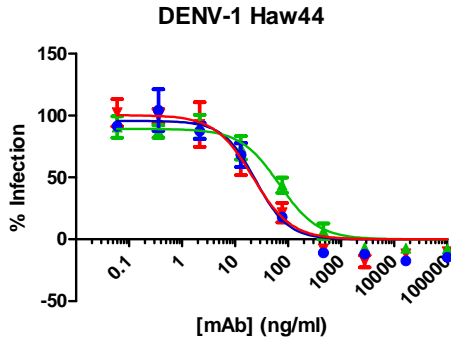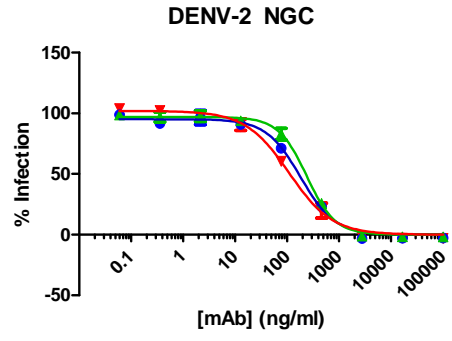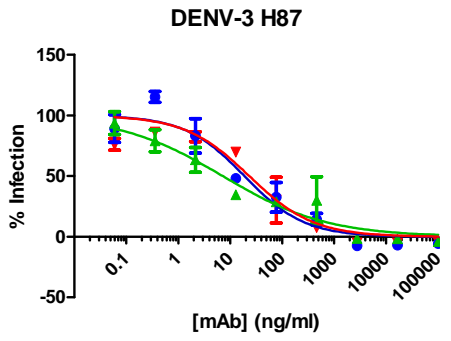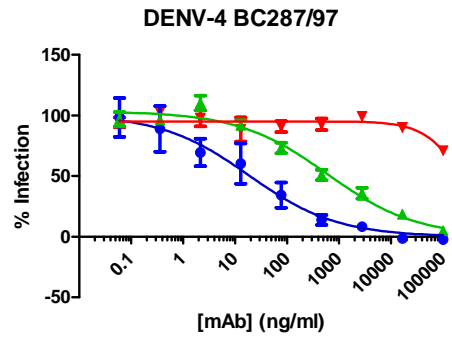

Supplement: NIHMS706754-supplement-3.pdf [file NIHMS706754-supplement-3.pdf]

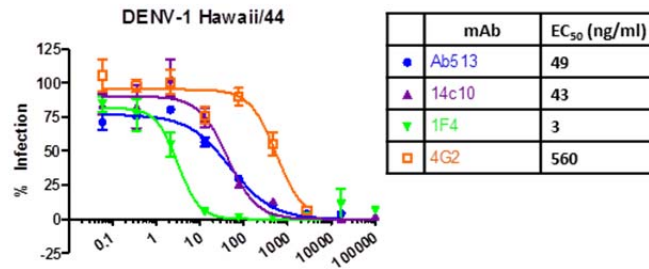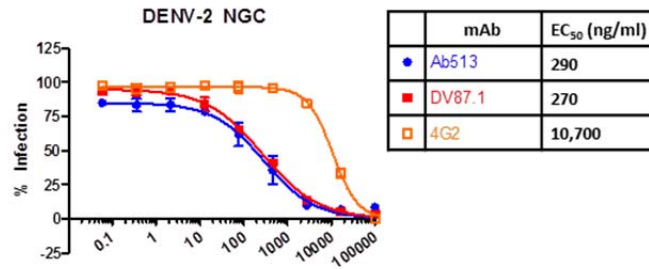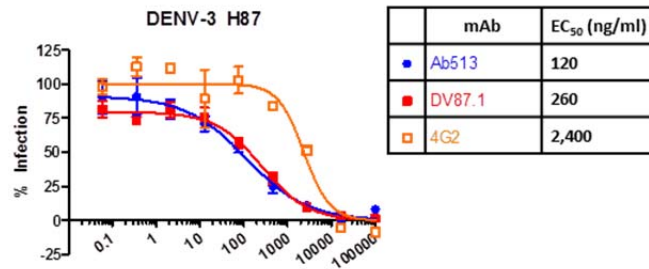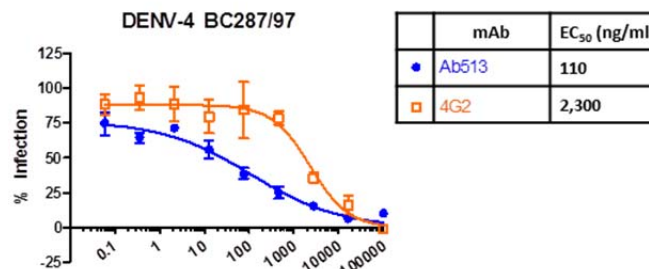

[mAb] (ng/ml)

Supplement: NIHMS706754-supplement-4.pdf [file NIHMS706754-supplement-4.pdf]

A.

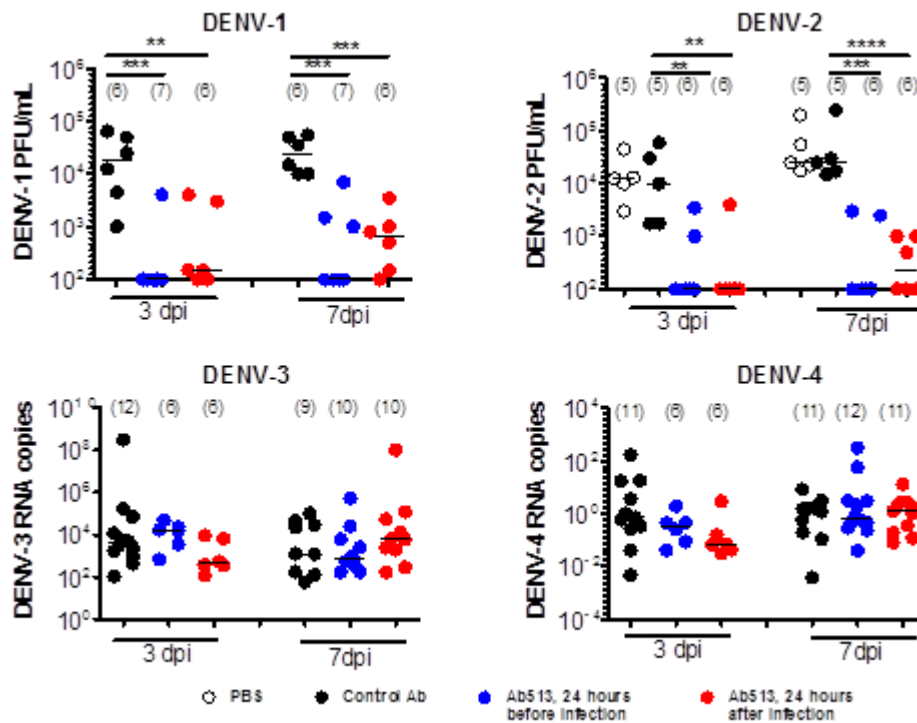

B.

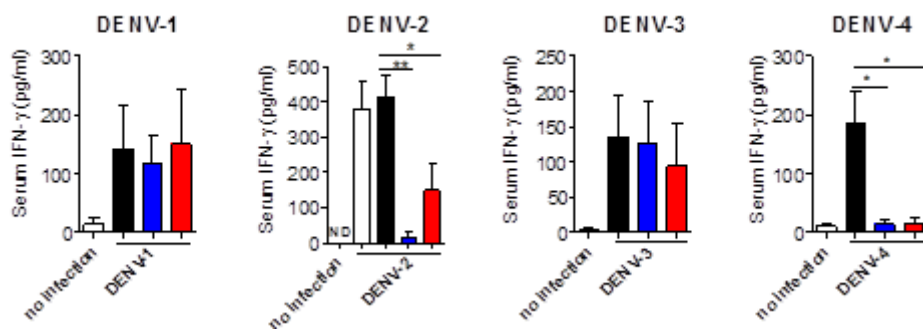

C.

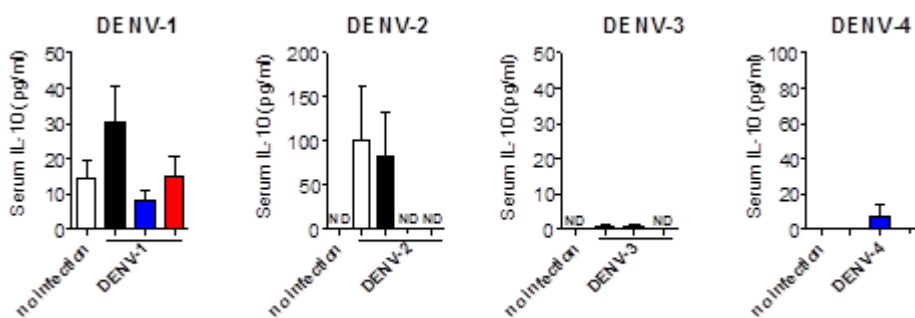

Supplement: NIHMS706754-supplement-5.pdf [file NIHMS706754-supplement-5.pdf]
